# Supplementary material
Source: publisher site journal article supplement (https://www.dovepress.com/article/396687)
Supplement: Supplementary file 1 [file get_supplementary_file.php]

| **Table S1** Age and gender distribution in participants without or with POST | | | | | | |  |
| --- | --- | --- | --- | --- | --- | --- | --- |
| Covariates |  | Without POST |  |  | With POST |  |  |
|  |  | Men  n=417 (56.5%) | Women  n= 321 (43.5%) | P | Men  n=66 (43.1%) | Women  n=87 (56.9%) | P |
| Age |  | 20.000 [8.000, 35.000] | 26.000 [13.000, 37.000] | <0.001 | 24.000 [11.000, 43.000] | 24.000 [13.000, 37.000] | 0.937 |
| ASA status | I | 372 (89.2) | 300 (93.5) | 0.045 |  |  |  |
|  | II | 45 (10.8) | 21 (6.5) |  |  |  |  |
| Catheter fixation types | Unilateral | 310 (74.3) | 204 (63.6) | 0.002 | 49 (74.2) | 61 (70.1) | 0.574 |
|  | Bilateral | 107 (25.7) | 117 (36.4) |  | 17 (25.8) | 26 (29.9) |  |
| Use of non-steroidal analgesics | No | 239 (57.3) | 143 (44.5) | 0.001 | 42 (63.6) | 44 (50.6) | 0.107 |
|  | Yes | 178 (42.7) | 178 (55.5) |  | 24 (36.4) | 43 (49.4) |  |
| Cough during extubation | No | 404 (96.9) | 317 (98.8) | 0.152 | 61 (92.4) | 83 (95.4) | 0.668 |
|  | Yes | 13 (3.1) | 4 (1.2) |  | 5 (7.6) | 4 (4.6) |  |
| Throat and lung disease | No | 408 (97.9) | 321 (100.0) | 0.021 | 63 (95.5) | 86 (98.9) | 0.428 |
|  | Yes | 9 (2.2) | 0 (0.0) |  | 3 (4.5) | 1n (1.1) |  |
| Nasal intubation | No | 342 (82.0) | 220 (68.5) | <0.001 | 56 (84.8) | 63 (72.4) | 0.067 |
|  | Yes | 75 (18.0) | 101 (31.5) |  | 10 (15.2) | 24 (27.6) |  |
| Surgical sites | 1 | 231 (55.4) | 113 (35.2) | <0.001 | 21 (31.8) | 33 (37.9) | 0.813 |
|  | 2 | 101 (24.2) | 82 (25.5) |  | 23 (34.8) | 24 (27.6) |  |
|  | 3 | 55 (13.2) | 78 (24.3) |  | 12 (18.2) | 20 (23.0) |  |
|  | 4 | 12 (2.9) | 18 (5.6) |  | 7 (10.6) | 6 (6.9) |  |
|  | 5 | 5 (1.2) | 7 (2.2) |  | 2 (3.0) | 2 (2.3) |  |
|  | 6 | 10 (2.4) | 19 (5.9) |  | 1 (1.5) | 2 (2.3) |  |
|  | 7 | 3 (0.7) | 4 (1.2) |  | / | / |  |
| Difficult laryngeal exposure | No | 417 (100.0) | 317 (98.8) | 0.075 | 65 (98.5) | 87 (100.0) | 0.889 |
|  | Yes | 0 (0.0) | 4 (1.2) |  | 1 (1.5) | 0 (0.0) |  |
| Intubation frequency | 1 | 414 (99.3) | 316 (98.4) | 0.464 | 64 (97.0) | 86 (98.9) | 0.808 |
|  | 2 | 3 (0.7) | 5 (1.6) |  | 2 (3.0) | 1 (1.1) |  |
| Operation time (h) | | 1.000 [0.500, 1.500] | 1.000 [0.500, 2.000] | 0.005 | 1.000 [0.875, 1.500] | 1.000 [0.500, 1.000] | 0.06 |
| Catheter sliding distance (cm) | | 0.000 [0.000,0.000] | 0.000 [0.000,0.000] | 0.117 | 0.000[0.000,0.000] | 0.000[0.000,0.000] | 0.91 |
| Cuff pressure (mmH2O) | | 36.000 [30.000, 45.000] | 35.000 [30.000, 42.000] | 0.089 | 37.000 [30.000, 48.000] | 35.000 [30.000, 40.000] | 0.372 |

**Abbreviations:** POST, postoperative sore throat; ASA, American Society of Anesthesiologists. Surgical sites: 1, maxillary-related surgery; 2, mandibular-related surgery; 3, maxillary-related surgery combined with mandibular-related surgery; 4, sublingual gland, lingual frenulum, and submandibular gland surgery; 5, tongue and cheek surgery; 6, surgery on external oral tissues such as parotid gland, condyle, zygomatic arch (extraoral incision); 7, malignant tumor and neck dissection.
